# Supplementary material for: Therapeutic Prospects of Exon Skipping for Epidermolysis Bullosa
Source: MDPI journal article supplement (doi:10.3390/ijms222212222), 2021-11-12
Supplement: s1 [file s1]

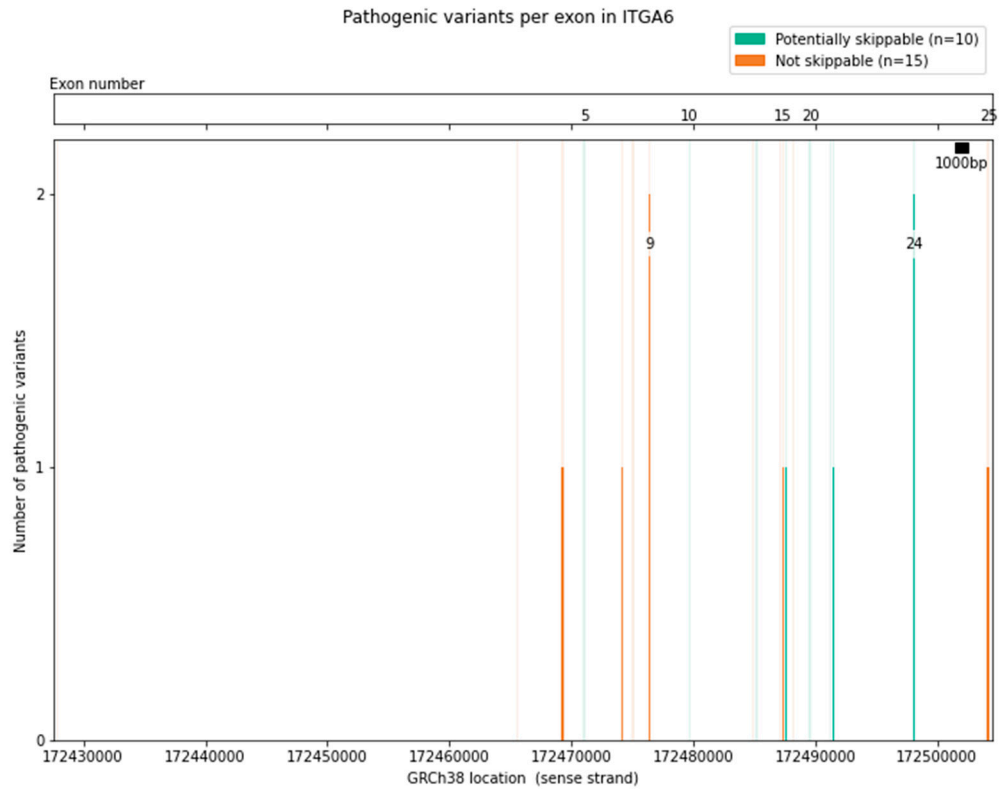

**Supplemental Figure S1.** Schematic representation of the genomic structure of *ITGA6* and pathogenic variants per exon. Light-green bars indicate in-frame (potentially skippable) exons, light-orange bars out-of-frame (non-skippable) exons. Exons are depicted to scale, scale-bar represents 1000 bps. Projected on top of each exon as dark-green and dark-orange bars are the number of pathogenic variants per exon, the height of each bar indicates the number of variants per exon. In the top bar the exon numbers.

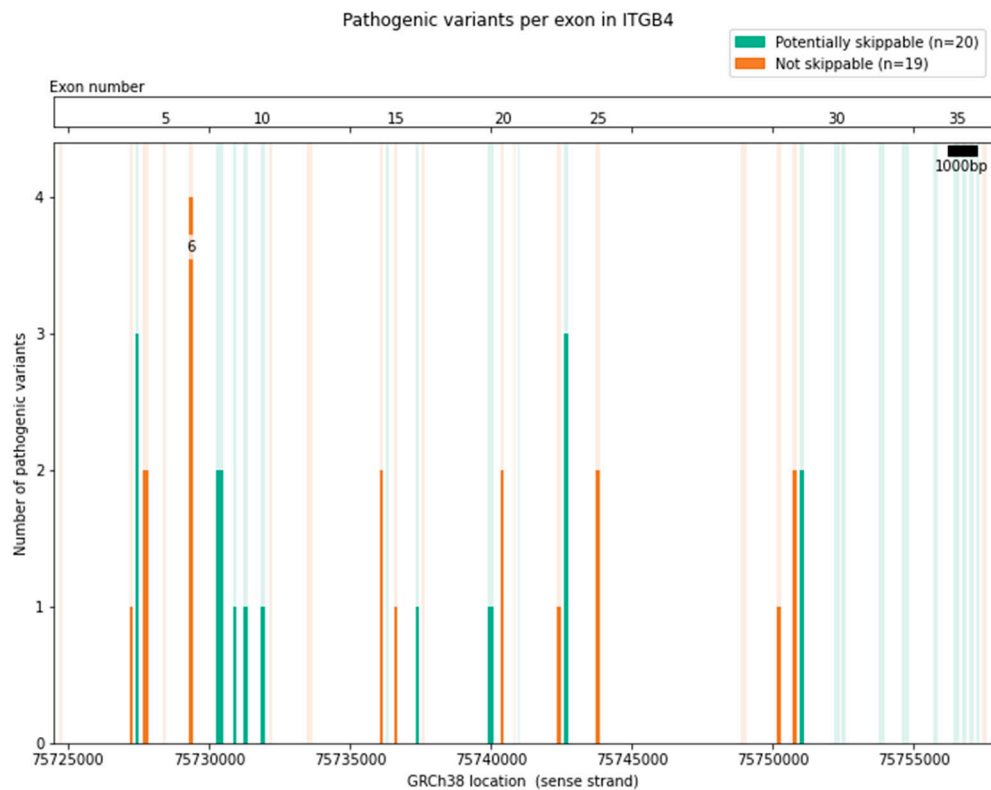

**Supplemental Figure S2.** Schematic representation of the genomic structure of *ITGB4* and pathogenic variants per exon. Light-green bars indicate in-frame (potentially skippable) exons, light-orange bars out-of-frame (non-skippable) exons. Exons are depicted to scale, scale-bar represents 1000 bps. Projected on top of each exon as dark-green and dark-orange bars are the number of pathogenic variants per exon, the height of each bar indicates the number of variants per exon. In the top bar the exon numbers.

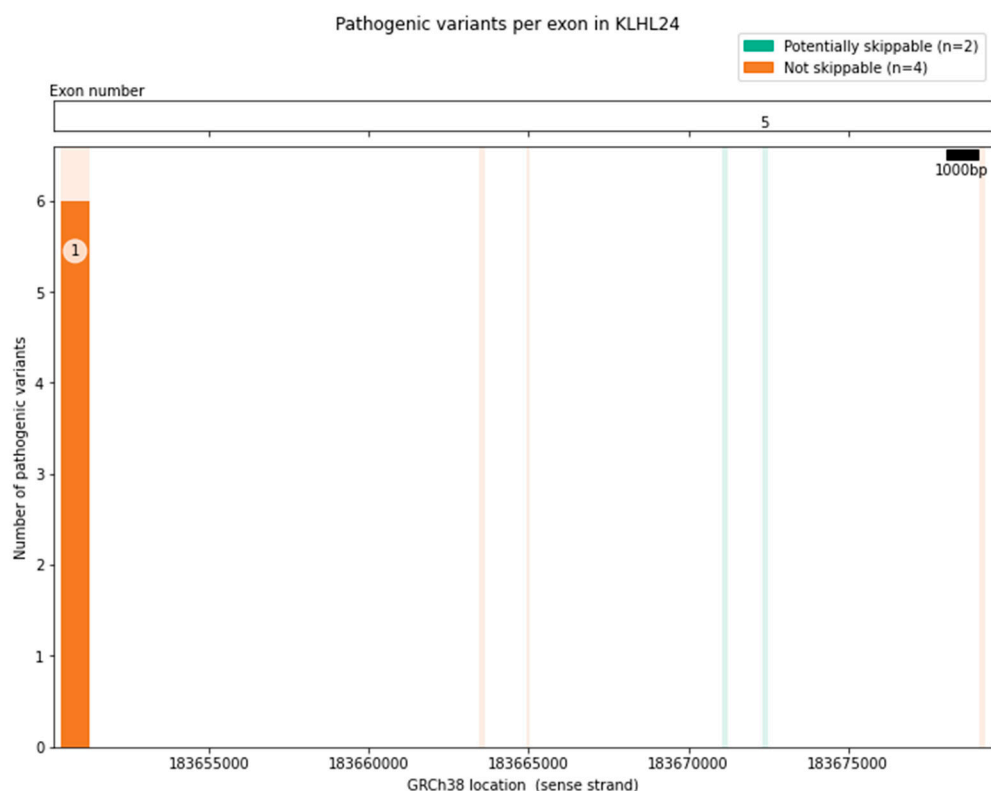

**Supplemental Figure S3.** Schematic representation of the genomic structure of *KLHL24* and pathogenic variants per exon. Light-green bars indicate in-frame (potentially skippable) exons, light-orange bars out-of-frame (non-skippable) exons. Exons are depicted to scale, scale-bar represents 1000 bps. Projected on top of each exon as dark-green and dark-orange bars are the number of pathogenic variants per exon, the height of each bar indicates the number of variants per exon. In the top bar the exon numbers.

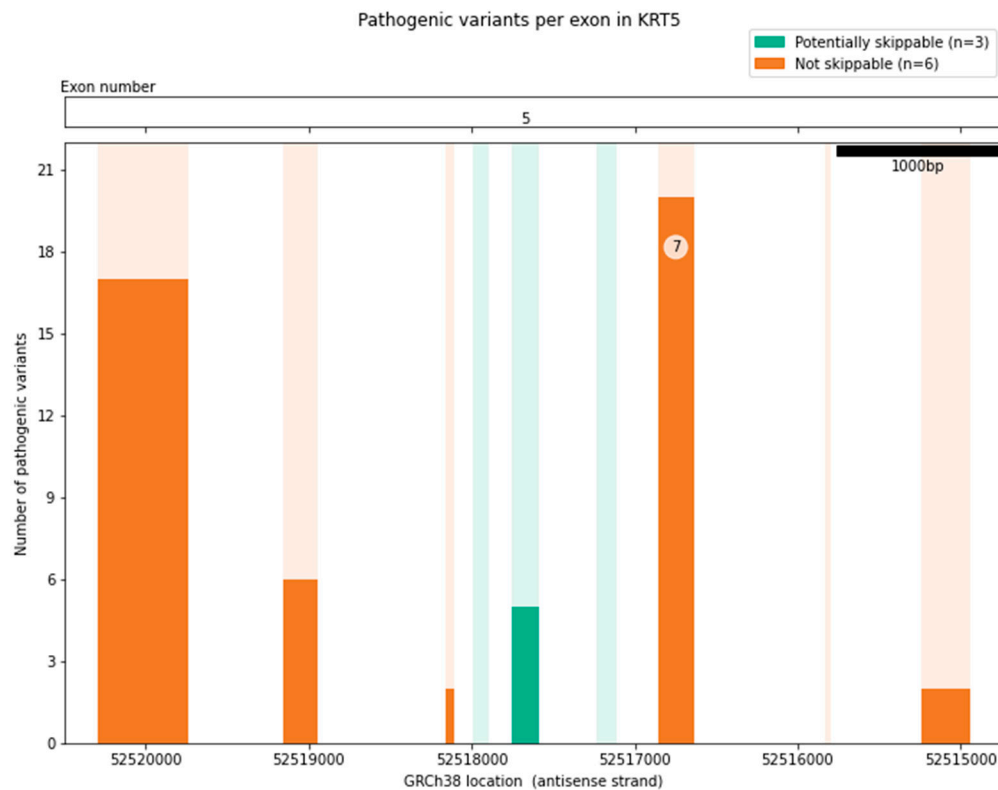

**Supplemental Figure S4.** Schematic representation of the genomic structure of *KRT5* and pathogenic variants per exon. Light-green bars indicate in-frame (potentially skippable) exons, light-orange bars out-of-frame (non-skippable) exons. Exons are depicted to scale, scale-bar represents 1000 bps. Projected on top of each exon as dark-green and dark-orange bars are the number of pathogenic variants per exon, the height of each bar indicates the number of variants per exon. In the top bar the exon numbers.

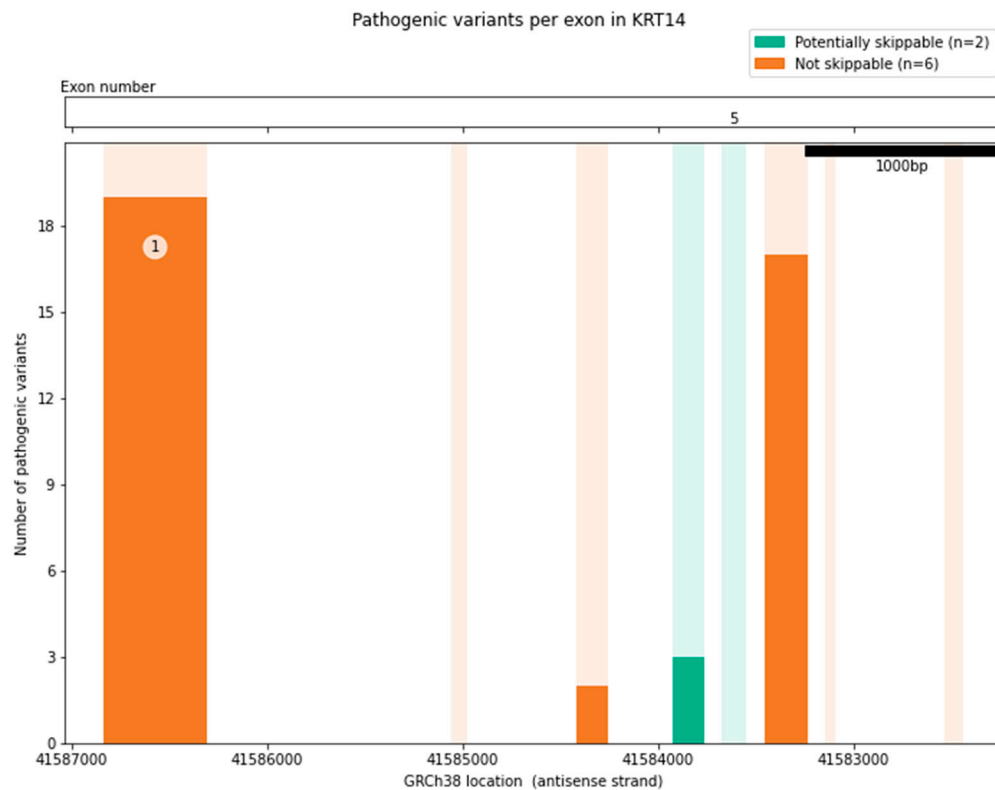

**Supplemental Figure S5.** Schematic representation of the genomic structure of *KRT14* and pathogenic variants per exon. Light-green bars indicate in-frame (potentially skippable) exons, light-orange bars out-of-frame (non-skippable) exons. Exons are depicted to scale, scale-bar represents 1000 bps. Projected on top of each exon as dark-green and dark-orange bars are the number of pathogenic variants per exon, the height of each bar indicates the number of variants per exon. In the top bar the exon numbers.

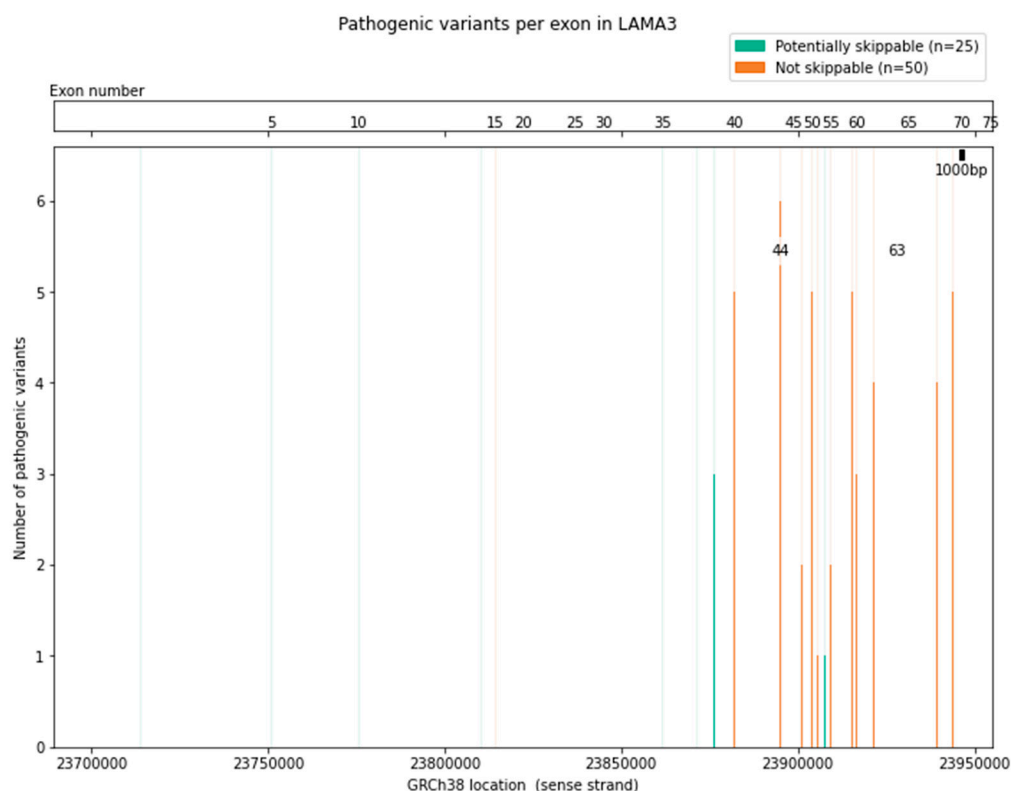

**Supplemental Figure S6.** Schematic representation of the genomic structure of *LAMA3* and pathogenic variants per exon. Light-green bars indicate in-frame (potentially skippable) exons, light-orange bars out-of-frame (non-skippable) exons. Exons are depicted to scale, scale-bar represents 1000 bps. Projected on top of each exon as dark-green and dark-orange bars are the number of pathogenic variants per exon, the height of each bar indicates the number of variants per exon. In the top bar the exon numbers.

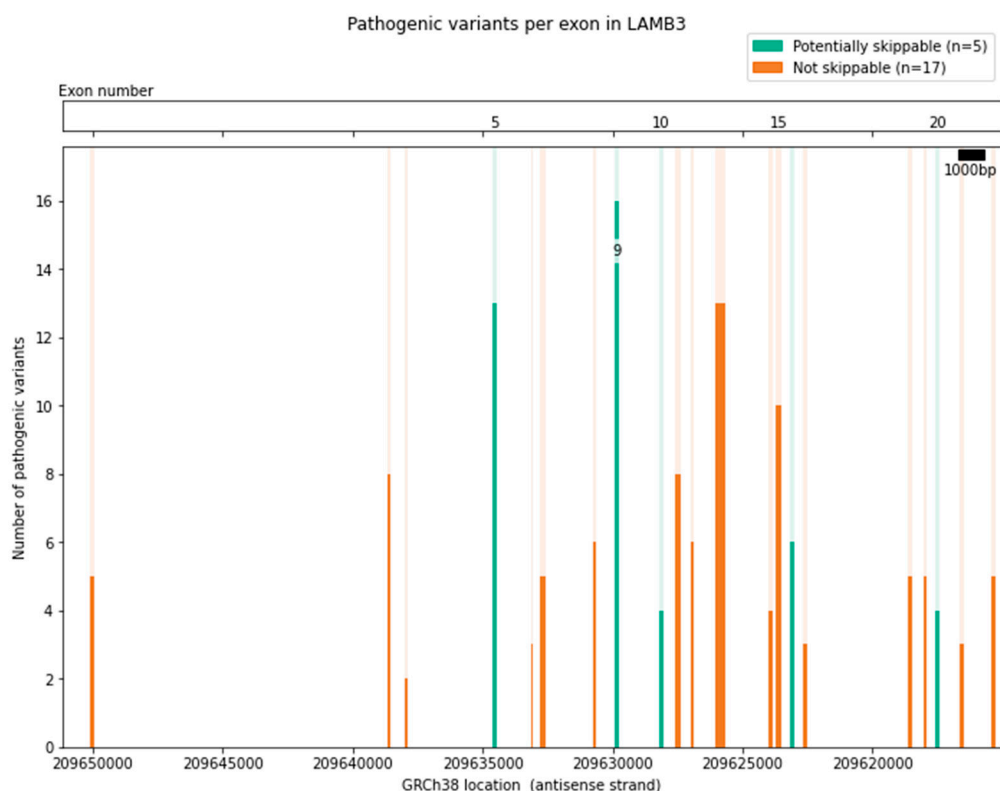

**Supplemental Figure S7.** Schematic representation of the genomic structure of *LAMB3* and pathogenic variants per exon. Light-green bars indicate in-frame (potentially skippable) exons, light-orange bars out-of-frame (non-skippable) exons. Exons are depicted to scale, scale-bar represents 1000 bps. Projected on top of each exon as dark-green and dark-orange bars are the number of pathogenic variants per exon, the height of each bar indicates the number of variants per exon. In the top bar the exon numbers.

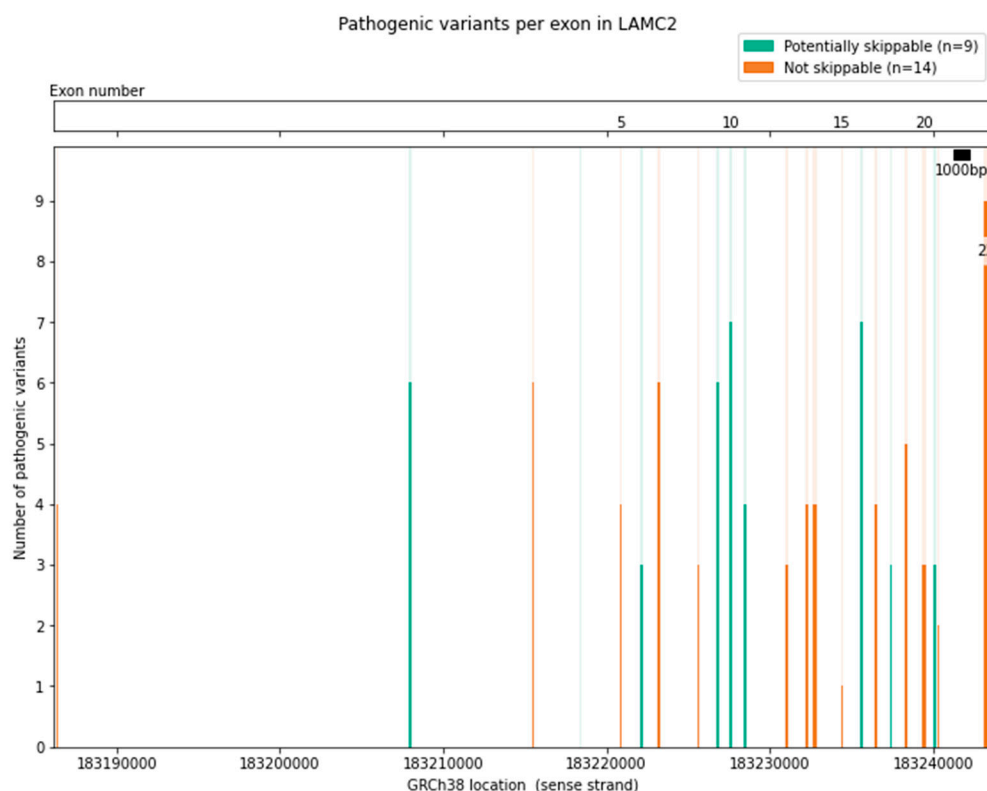

**Supplemental Figure S8.** Schematic representation of the genomic structure of *LAMC2* and pathogenic variants per exon. Light-green bars indicate in-frame (potentially skippable) exons, light-orange bars out-of-frame (non-skippable) exons. Exons are depicted to scale, scale-bar represents 1000 bps. Projected on top of each exon as dark-green and dark-orange bars are the number of pathogenic variants per exon, the height of each bar indicates the number of variants per exon. In the top bar the exon numbers.

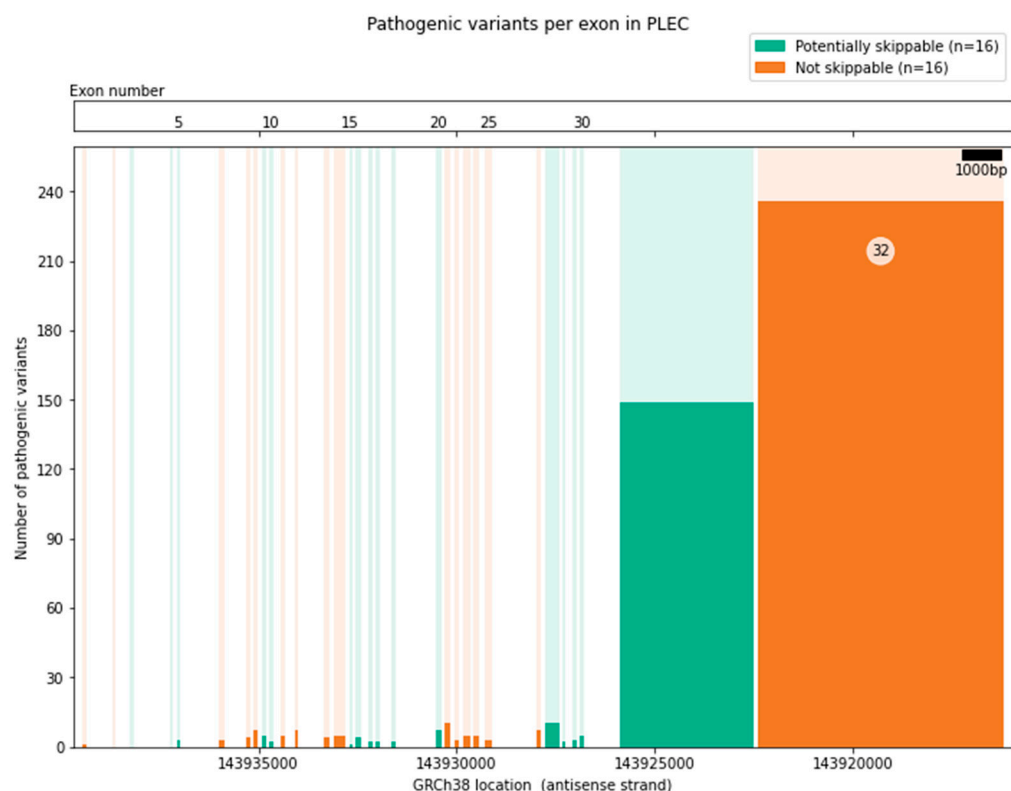

**Supplemental Figure S9.** *PLEC* Schematic representation of the genomic structure of *PLEC* and pathogenic variants per exon. Light-green bars indicate in-frame (potentially skippable) exons, light-orange bars out-of-frame (non-skippable) exons. Exons are depicted to scale, scale-bar represents 1000 bps. Projected on top of each exon as dark-green and dark-orange bars are the number of pathogenic variants per exon, the height of each bar indicates the number of variants per exon. In the top bar the exon numbers.

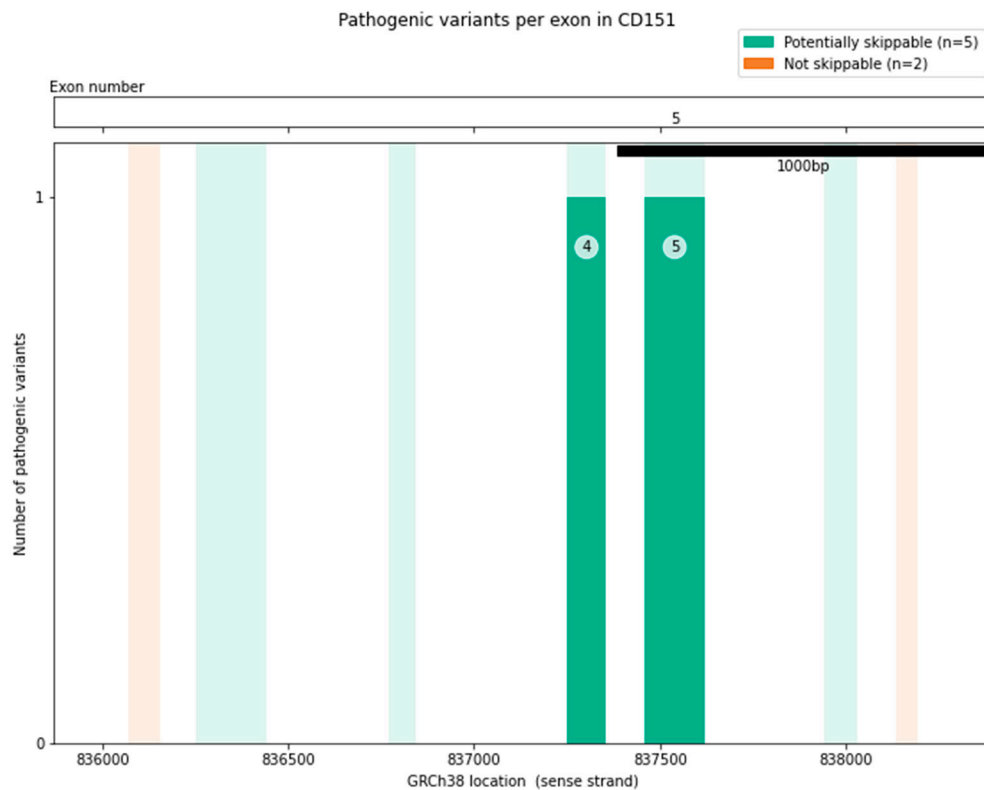

**Supplemental Figure S10.** Schematic representation of the genomic structure of *CD151* and pathogenic variants per exon. Light-green bars indicate in-frame (potentially skippable) exons, light-orange bars out-of-frame (non-skippable) exons. Exons are depicted to scale, scale-bar represents 1000 bps. Projected on top of each exon as dark-green and dark-orange bars are the number of pathogenic variants per exon, the height of each bar indicates the number of variants per exon. In the top bar the exon numbers.

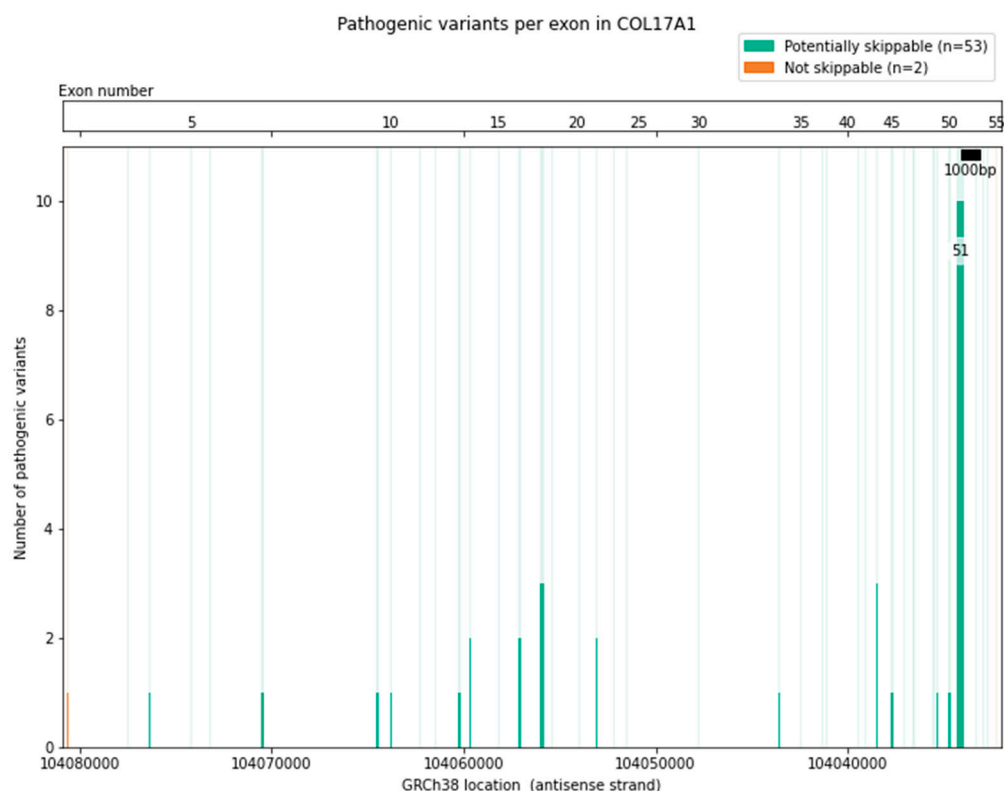

**Supplemental Figure S11.** Schematic representation of the genomic structure of *COL17A1* and pathogenic variants per exon. Light-green bars indicate in-frame (potentially skippable) exons, light-orange bars out-of-frame (non-skippable) exons. Exons are depicted to scale, scale-bar represents 1000 bps. Projected on top of each exon as dark-green and dark-orange bars are the number of pathogenic variants per exon, the height of each bar indicates the number of variants per exon. In the top bar the exon numbers.

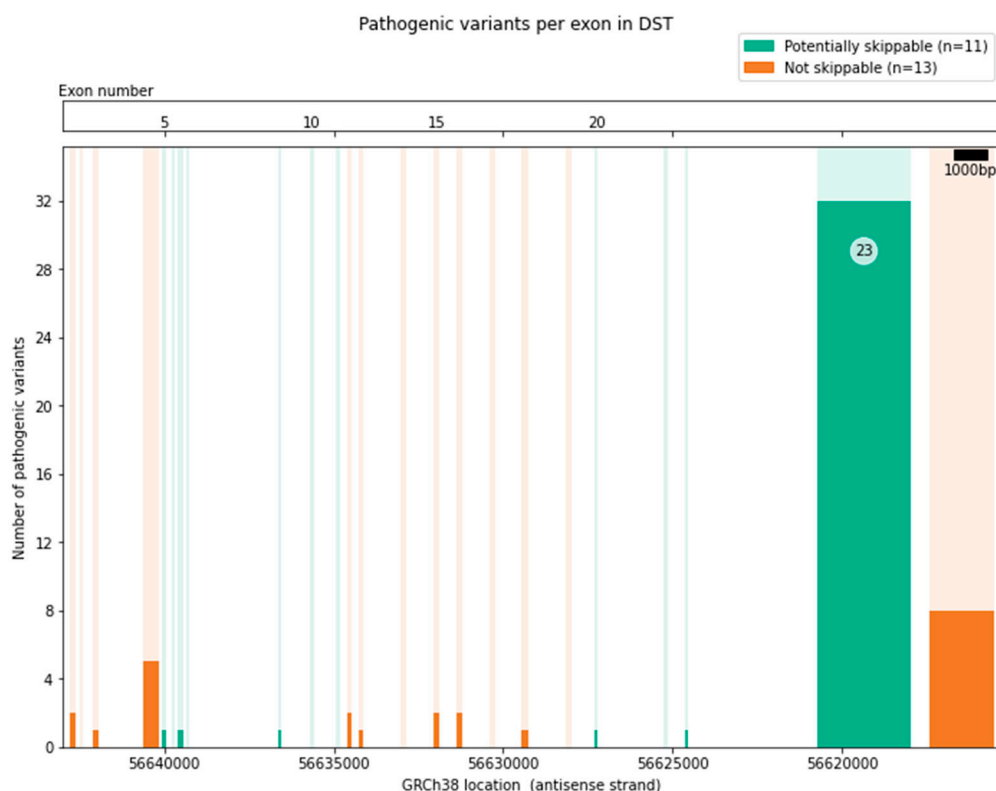

**Supplemental Figure S12.** Schematic representation of the genomic structure of *DST* and pathogenic variants per exon. Light-green bars indicate in-frame (potentially skippable) exons, light-orange bars out-of-frame (non-skippable) exons. Exons are depicted to scale, scale-bar represents 1000 bps. Projected on top of each exon as dark-green and dark-orange bars are the number of pathogenic variants per exon, the height of each bar indicates the number of variants per exon. In the top bar the exon numbers.

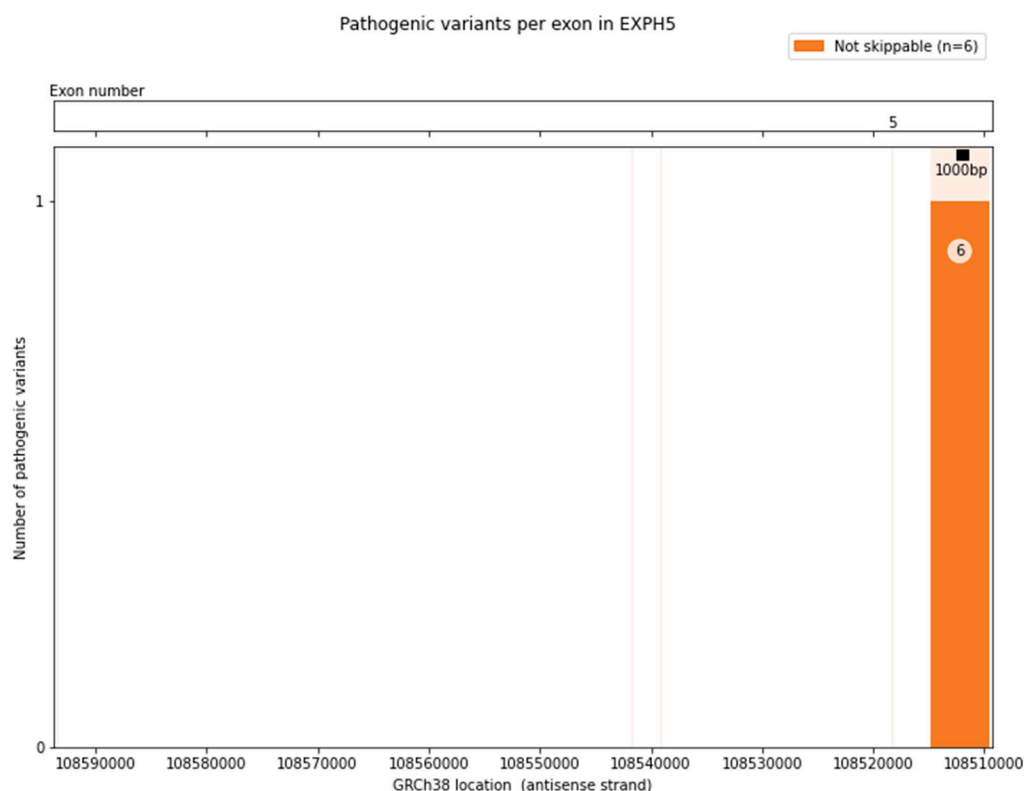

**Supplemental Figure S13.** Schematic representation of the genomic structure of *EXPH5* and pathogenic variants per exon. Light-green bars indicate in-frame (potentially skippable) exons, light-orange bars out-of-frame (non-skippable) exons. Exons are depicted to scale, scale-bar represents 1000 bps. Projected on top of each exon as dark-green and dark-orange bars are the number of pathogenic variants per exon, the height of each bar indicates the number of variants per exon. In the top bar the exon numbers.

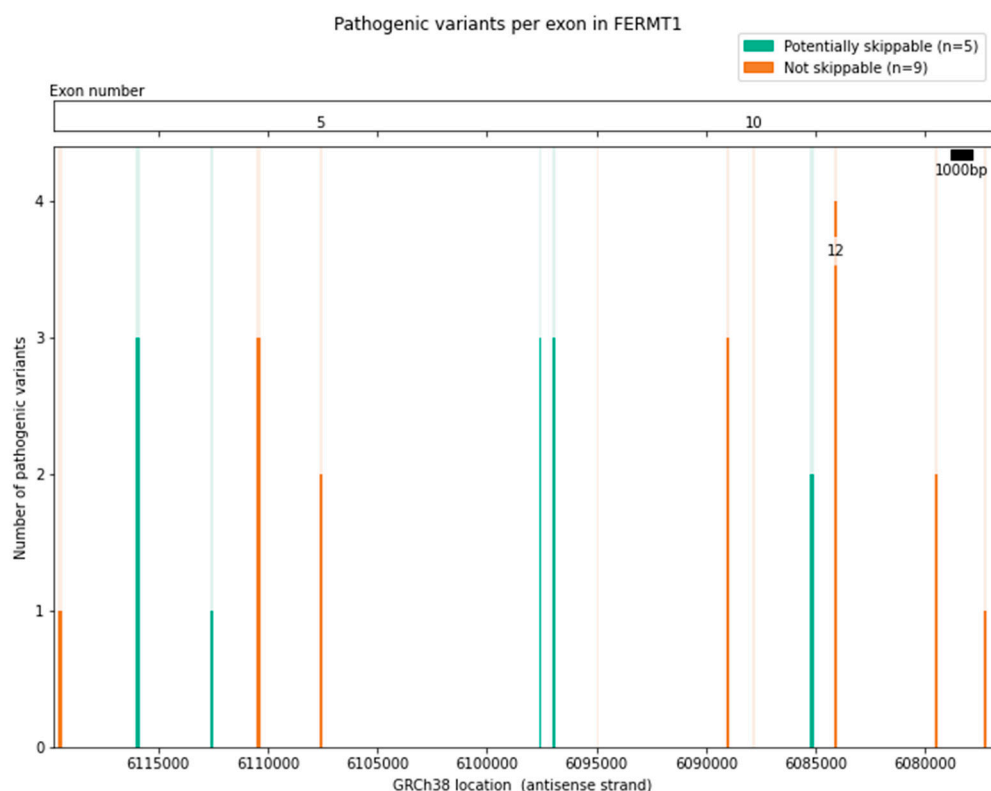

**Supplemental Figure S14.** Schematic representation of the genomic structure of *FERMT1* and pathogenic variants per exon. Light-green bars indicate in-frame (potentially skippable) exons, light-orange bars out-of-frame (non-skippable) exons. Exons are depicted to scale, scale-bar represents 1000 bps. Projected on top of each exon as dark-green and dark-orange bars are the number of pathogenic variants per exon, the height of each bar indicates the number of variants per exon. In the top bar the exon numbers.

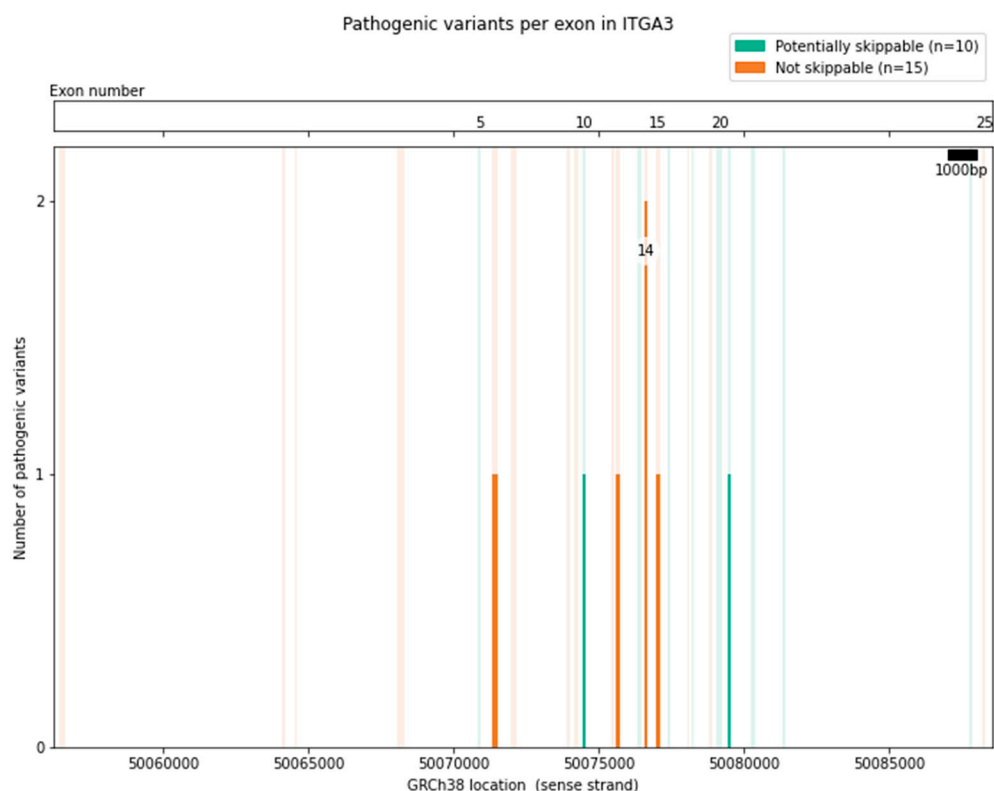

**Supplemental Figure S15.** Schematic representation of the genomic structure of *ITGA3* and pathogenic variants per exon. Light-green bars indicate in-frame (potentially skippable) exons, light-orange bars out-of-frame (non-skippable) exons. Exons are depicted to scale, scale-bar represents 1000 bps. Projected on top of each exon as dark-green and dark-orange bars are the number of pathogenic variants per exon, the height of each bar indicates the number of variants per exon. In the top bar the exon numbers.
